# Supplementary material for: Targeted long-read sequencing enables higher diagnostic yield of ADPKD by accurate PKD1 genetic analysis in an assisted reproductive center
Source: Research Square preprint supplement (doi:10.21203/rs.3.rs-5235348/v1), 2024-11-20
Supplement: Supplementary file 1 [file 616cf3b24c01dd9f4655d688.xlsx]

## Sheet: Sheet1
Supplemental Table 1. List of primers used for Sanger sequencing and cDNA analysis.
Purpose	PKD1 variant	Primer name	Forward primer sequence (5'→3')	Reverse primer sequence (3'→5')
Validation of SNVs/indels	c.-49_+43del; c.160_166dup	PKD1-E1-long	CCAGTCCCTCATCGCTGG	TCCTTATTTAGCAGGGCCGCC
		PKD1-E1-short	GCGCCTCGGCCGACTCTG	CCTTATTTAGCAGGGCCGCC
	c.2180T>C	PKD1-E2-long	ATAGAGGTGGCGCCTGCTCCC	CAGTGAGGGGAGGCACCTACA
		PKD1-E11-short	ACCCTCATCCGTCGTGCG	CCGACGTCCCCAGTAACTG
	c.8161+1G>A	PKD1-3	GTATGCCCTTCCGCCGTCCAAG	GAACTGGGCAATGAAGAGGAAAGC
		Nest PCR	GATGAGCTGCACCACGTCACTGAG	CTCTCATGTGAAGAGGTGCCTTGTG
	c.2985+2_2985+4del	PKD1-E12-long	TGTAGGTGCCTCCCCTCACT	AGACCCCCAATCAGGCCAGC
		PKD1-E12-short	CTGGAGAGCCGGACAGTG	GAAAAGCAACCCCGTGATGT
	c.10709_10760dup	PKD1-E36	GGTTAACATGGGCTTGGCTG	TTCTGAGGTGAGGAAAGGGG
	c.1607-76C>T	PKD1-E2-long	ATAGAGGTGGCGCCTGCTCCC	CAGTGAGGGGAGGCACCTACA
		PKD1-E8-short	GGACAGTGATGGGGCTCC	GCTCAGAGAAAAGGCCTGGA
	c.2098-107G>A	PKD1-E2-long	ATAGAGGTGGCGCCTGCTCCC	CAGTGAGGGGAGGCACCTACA
		PKD1-c2098-107	TGACCTCCGACCTCTGCAGT	AGCATGAGGACATCCTGGCC
cDNA analysis	c.2098-107G>A	PKD1-RT-C2098	GTCAGGGCCAGGGCTACC	GTTTTCCACCACCACGTCCAC
	c.1607-76C>T	PKD1-RT-C1607	GTCTGCGAGCTGCAGCCC	AGTCCAGGGTTGGGCCTCAA
	c.12048C>T	PKD1-RT-C12048	TCACTAGCTTCGACCAGGTG	GTGACAGGTGCCAGGACTC
	E43-44dup	PKD1-RT-E43	CACAACTGGCTGGACAACA	TAGAGAGCCCAGTCCCAGG
