# Supplementary material for: Targeted long-read sequencing enables higher diagnostic yield of ADPKD by accurate PKD1 genetic analysis in an assisted reproductive center
Source: Research Square preprint supplement (doi:10.21203/rs.3.rs-5235348/v1), 2024-11-20
Supplement: Supplementary file 1 [file b375534a43b765625059b780.pdf]

Supplemental Figure 1

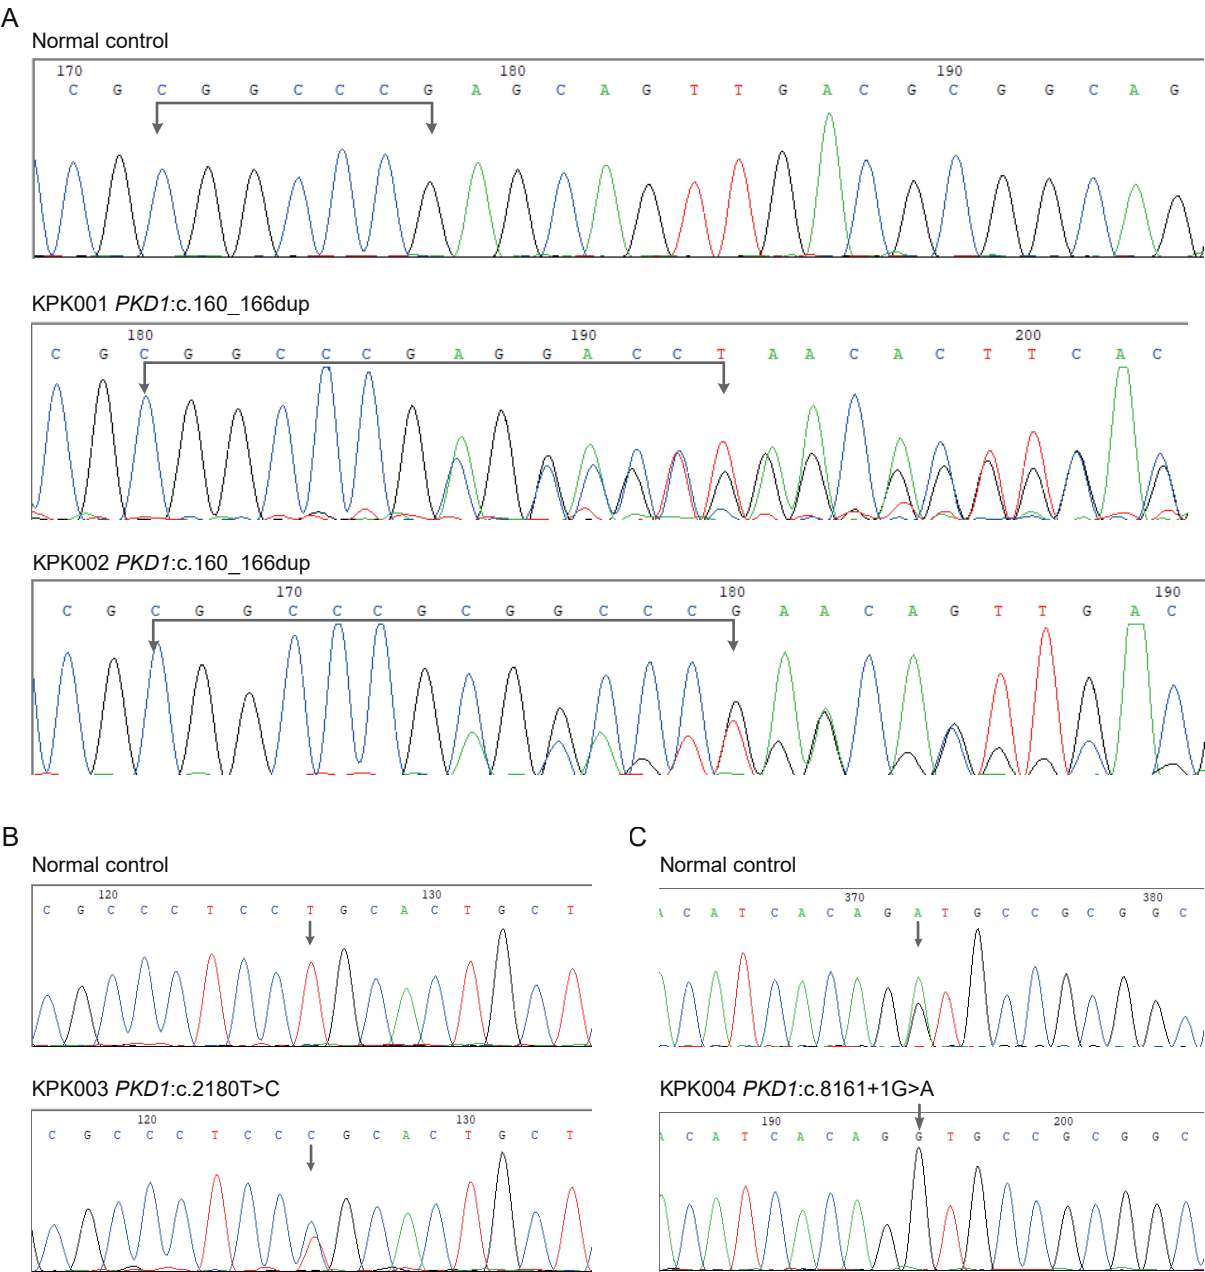

Supplemental Figure 1. Confirmation of *PKD1*:c.160\_166dup in KPK001 and KPK002 (A), *PKD1*:c.2180T>C in KPK003 (B), and *PKD1*:c.8161+1G>A in KPK004 (C) by Sanger sequencing.
