# Supplementary material for: Targeted long-read sequencing enables higher diagnostic yield of ADPKD by accurate PKD1 genetic analysis in an assisted reproductive center
Source: Research Square preprint supplement (doi:10.21203/rs.3.rs-5235348/v1), 2024-11-20
Supplement: Supplementary file 2 [file c05e88442239a9ec0794b82e.pdf]

Supplemental Figure 2

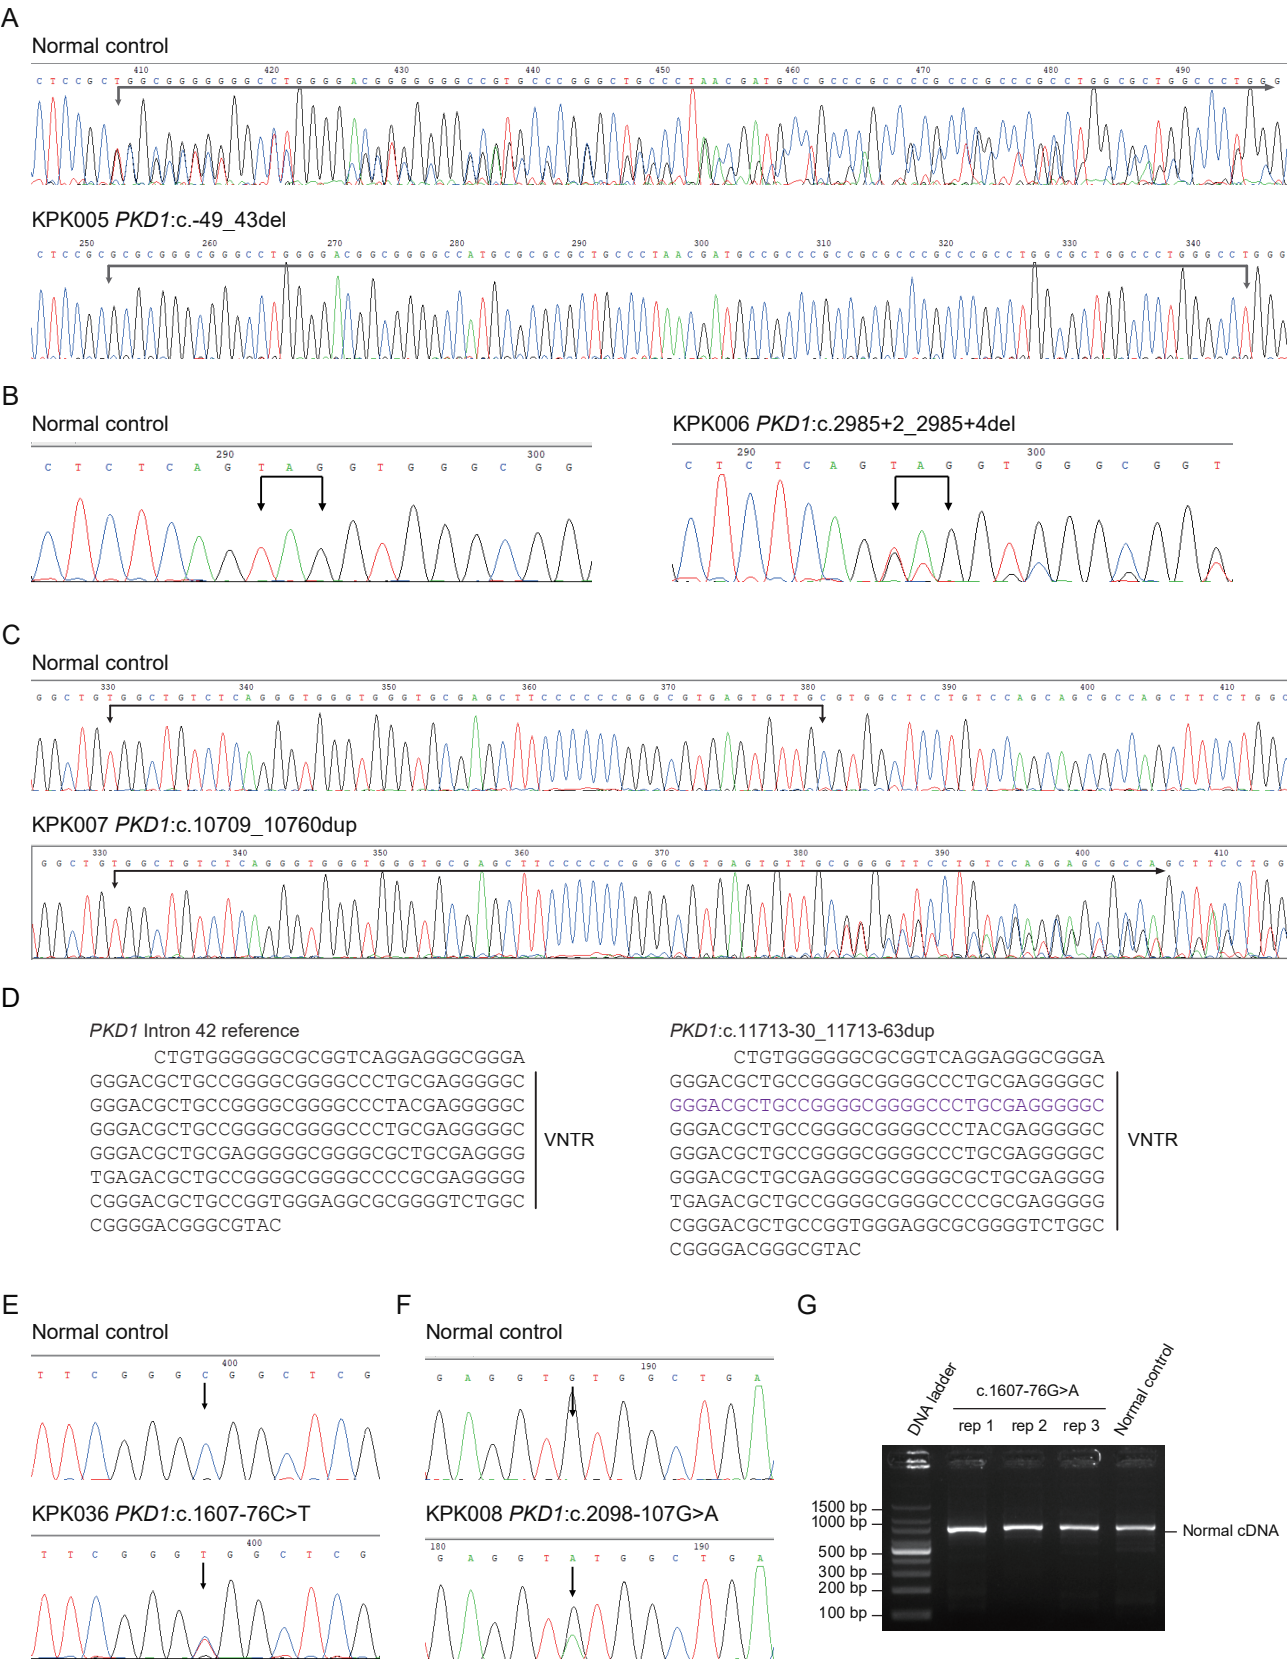

Supplemental Figure 2. Confirmation of variants identified by targeted LRS. (A-C) Confirmation of *PKD1*:c.-49\_+43del in KPK005 (A), *PKD1*:c.2985+2\_2985+4del in KPK006 (B), and *PKD1*:c.10709\_10760dup in KPK007 (C) by Sanger sequencing. (D) Display of *PKD1*:c.11713-30\_11713-63dup in an array of variable number of tandem repeats (VNTR) in intron 42. (E-F) Confirmation of *PKD1*:c.1607-76C>T in KPK036 (E), and *PKD1*:c.2098-107G>A in KPK008 (F). (G) Amplification of cDNA showing that mRNA splicing was not affected by *PKD1*:c.1607-76C>T in KPK036.
