# Supplementary material for: Targeted long-read sequencing enables higher diagnostic yield of ADPKD by accurate PKD1 genetic analysis in an assisted reproductive center
Source: Research Square preprint supplement (doi:10.21203/rs.3.rs-5235348/v1), 2024-11-20
Supplement: Supplementary file 3 [file f7795a64fc3f667244fc168b.pdf]

Supplemental Figure 3

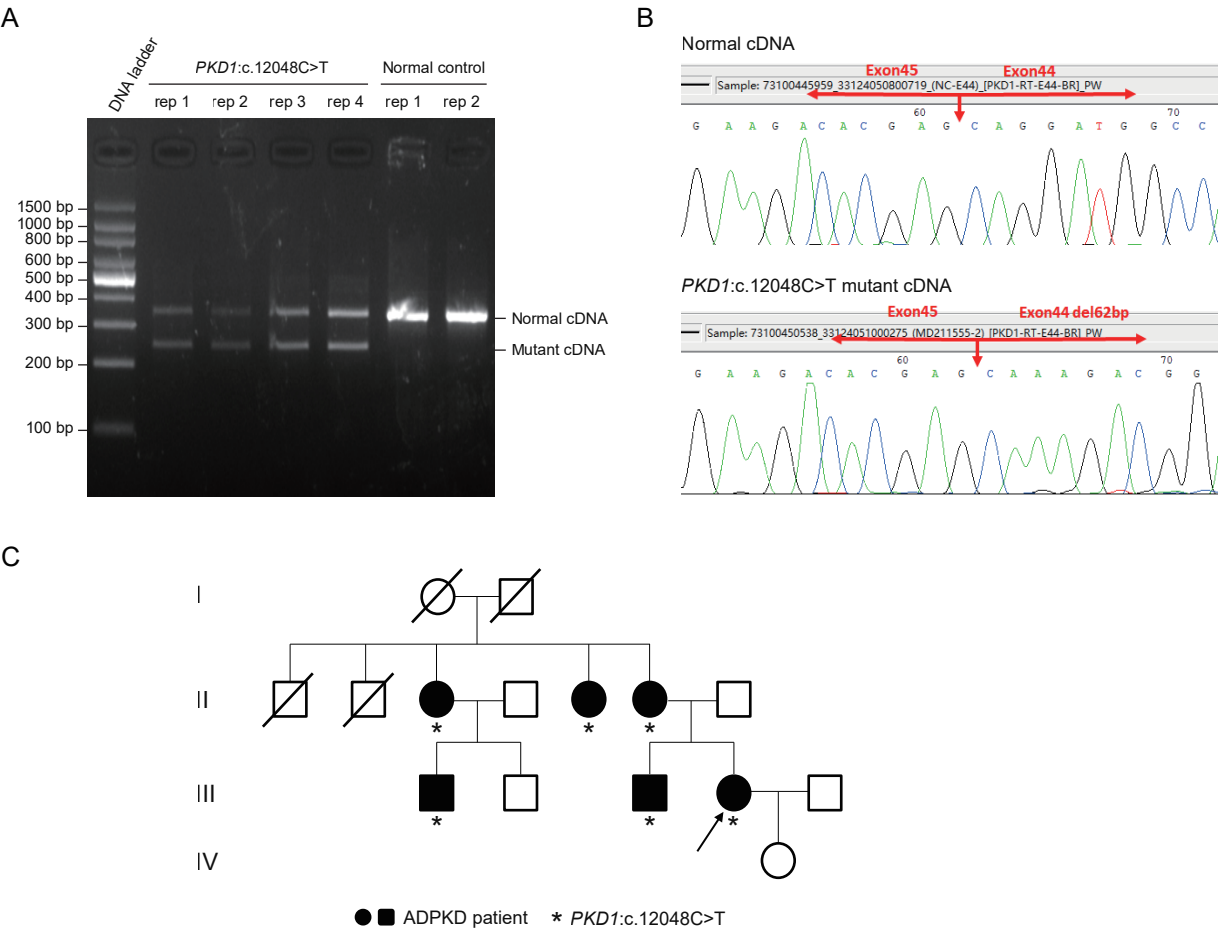

Supplemental Figure 3. Validation of the pathogenicity of the synonymous variant *PKD1*:c.12048C>T in KPK035. (A) Amplification of cDNA showing that mRNA splicing was affected by *PKD1*:c.12048C>T. (B) Sanger sequencing of the mutant cDNA showed deletion of 62 bp in exon 44, which was correlated to p.G4016Afs\*110. (C) The pedigree, phenotypes and genotypes of the family of KPK035.
